# Supplementary material for: Tracing natural groundwater recharge to the Thiaroye aquifer of Dakar, Senegal
Source: Springer Nature journal article supplement (doi:10.1007/s10040-018-01923-8), 2019-02-12

**HYDROGEOLOGY JOURNAL – ELECTRONIC SUPPLEMENTARY MATERIAL****Tracing natural groundwater recharge to the Thiaroye aquifer of Dakar, Senegal**

Seynabou.C. Faye<sup>1\*</sup>, M.L Diongue.<sup>1</sup>, Abdoulaye Pouye<sup>1</sup>, Cheikh B. Gaye<sup>1</sup>, Yves. Travi<sup>2</sup>, Stefan Wohnlich<sup>3</sup>,  
Serigne. Faye<sup>1</sup>, Richard G. Taylor<sup>4</sup>

1. Department of Geology, Faculty of Sciences & Techniques, University Cheikh Anta Diop, Dakar, Senegal

2. Hydrogeology laboratory, Faculty of Sciences, Avignon University F-84000 Avignon

3. Institute of Geology, Mineralogy and Geophysics Chair Applied Geology, Ruhr University Bochum, D-44780  
Bochum, Germany

4. Department of Geography, University College London, UK

\* corresponding author email: [seynaboucisse.faye@ucad.edu.sn](mailto:seynaboucisse.faye@ucad.edu.sn)

**Fig S1** Daily groundwater-level fluctuations in wells P3-1 and PSQ1 in the Thiaroye suburban from February 2010 to March 2011

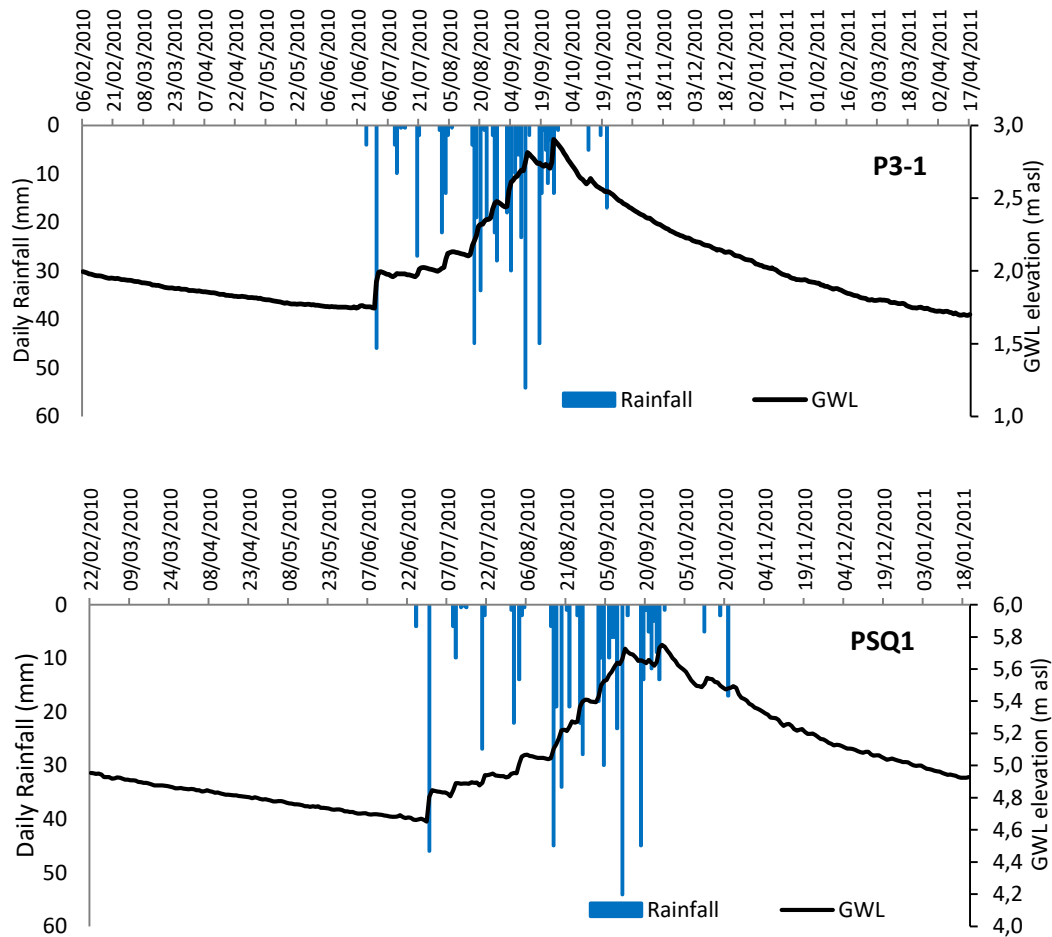

**Fig S2** Hourly groundwater-level fluctuations in wells P2-6, P2-2, and P2-5 in the Thiaroye suburban from May 2017 to August 2018

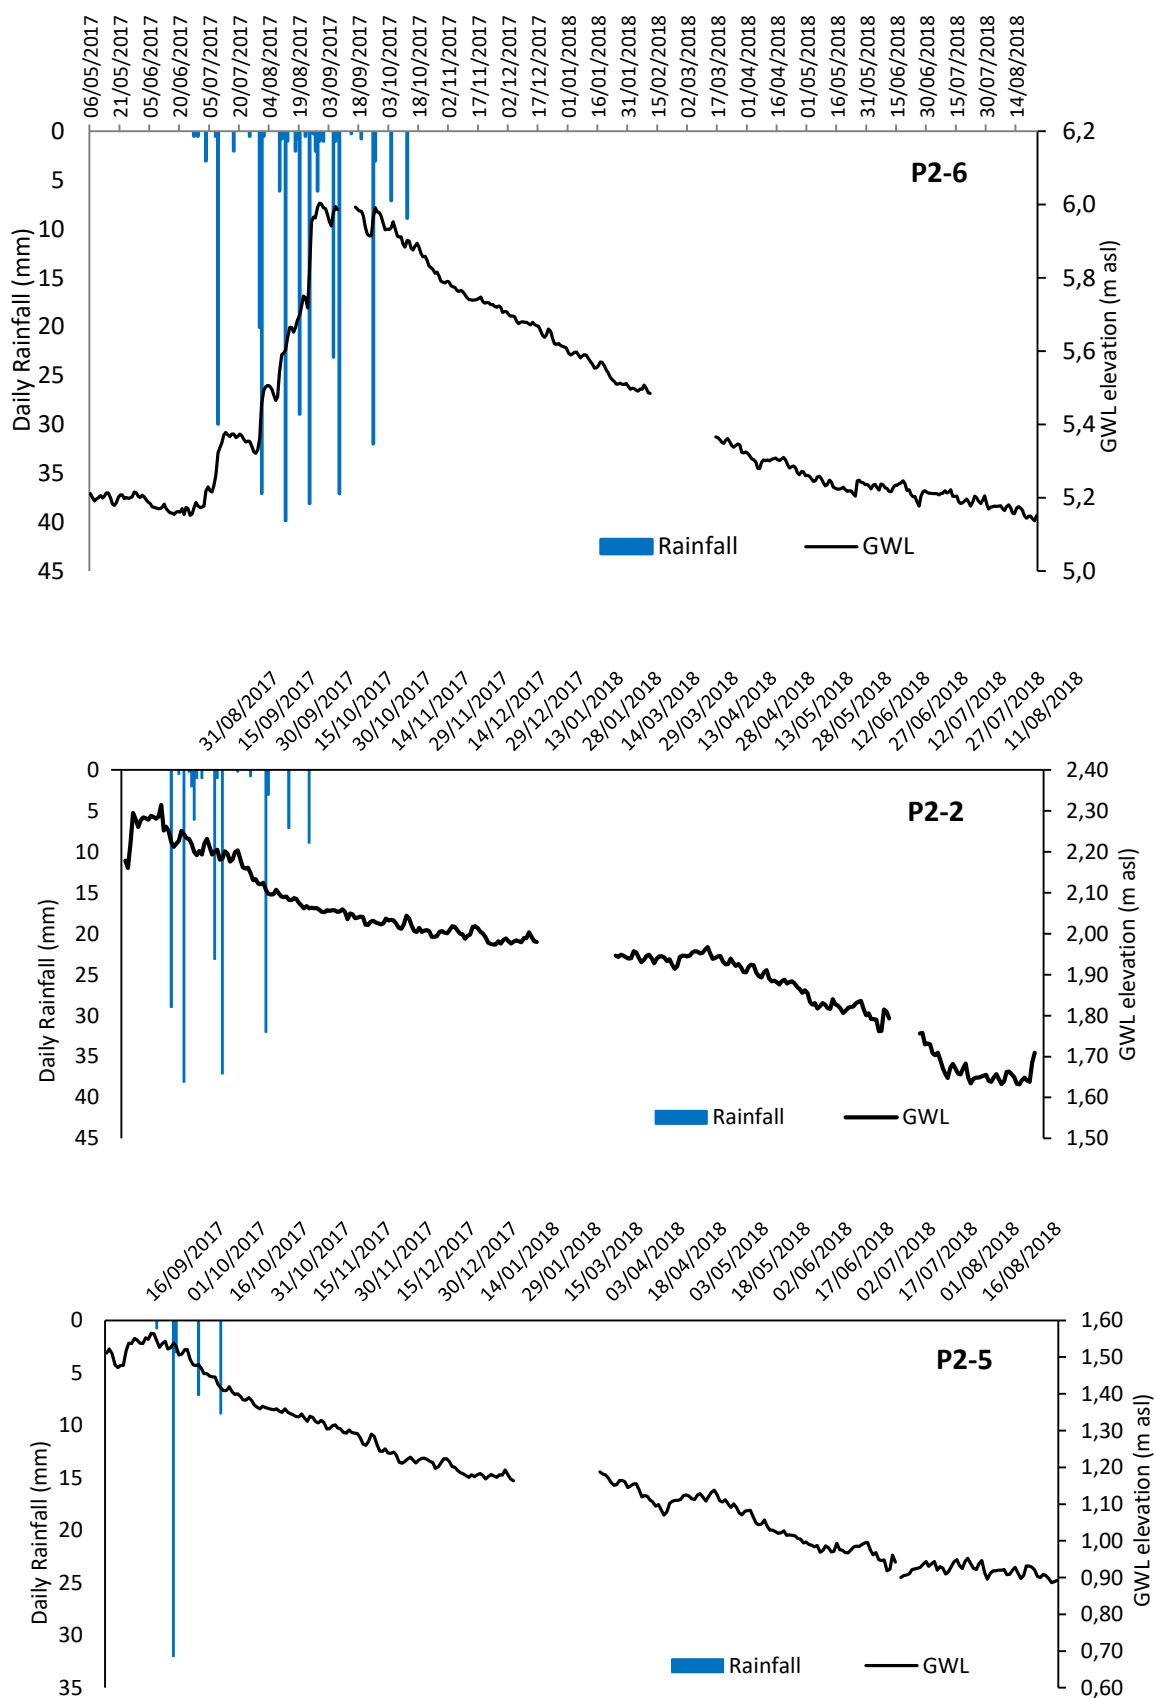

Supplement: MOESM1 [file 16467374]
